# Supplementary material for: Essential pro-Bmp roles of crossveinless 2 in mouse organogenesis
Source: Oxford University Press journal article supplement (doi:10.1242/dev.02647), 2006-10-12
Supplement: dev02647supptables.pdf [file dev02647supptables.pdf]

**Table S1. Number of mice with each genotype in  $Cv2^{+/-}$  intercrossing**

|       | $Cv2$     |           |            |
|-------|-----------|-----------|------------|
|       | $+/+$     | $+/-$     | $-/-$      |
| E12.5 | 35 (24.6) | 77 (54.2) | 30 (21.1)  |
| E14.5 | 28 (22.8) | 69 (56.1) | 26 (21.1)  |
| E18.5 | 11 (33.3) | 14 (42.4) | 8 (24.2)   |
| P0    | 9 (21.4)  | 21 (50.0) | 12 (28.6)* |
| Adult | 40 (37.0) | 68 (63.0) | 0 (0)      |

\*All the neonates died soon after birth.

Percentages are given in parentheses.

**Table S2. Penetrance of skeletal abnormalities in *Cv2*<sup>-/-</sup> mice**

|                                             | Phenotypes          | <i>Cv2</i>        |           |
|---------------------------------------------|---------------------|-------------------|-----------|
|                                             |                     | +/+ or +/- (n=15) | -/- (n=9) |
| Metopic suture                              | Normal              | 15                | 0         |
|                                             | Less ossified       | 0                 | 9         |
| Interparietal bone                          | Normal              | 15                | 0         |
|                                             | Small               | 0                 | 9         |
| Supraoccipital bone                         | Normal              | 15                | 0         |
|                                             | Small               | 0                 | 4         |
|                                             | Small, not ossified | 0                 | 5         |
| Basisphenoid                                | Normal              | 15                | 0         |
|                                             | Presence of cavity  | 0                 | 9         |
| Retrotympanic process of the squamosal bone | Normal              | 15                | 0         |
|                                             | Lost                | 0                 | 9         |
| Laryngeal cartilage                         | Normal              | 15                | 0         |
|                                             | Malformed*          | 0                 | 9         |
| Bronchial cartilage                         | Normal              | 15                | 0         |
|                                             | Lost                | 0                 | 9         |
| Vertebral arch                              | Normal              | 15                | 0         |
|                                             | Lost <sup>†</sup>   | 0                 | 9         |
| Rib                                         | Normal              | 15                | 0         |
|                                             | Thinner             | 0                 | 9         |
| Rib (T13)                                   | Normal              | 15                | 0         |
|                                             | No ribs attached    | 0                 | 9         |
| Scapula                                     | Normal              | 15                | 2         |
|                                             | Malformed           | 0                 | 7         |
| Deltoid tuberosity                          | Normal              | 15                | 0         |
|                                             | Lost                | 0                 | 9         |
| Symphysis of the pubic bone                 | Normal              | 15                | 6         |
|                                             | Diastasis           | 0                 | 3         |

\*Laryngeal cartilage malformation: the lesser horn was almost lost, the greater horn was slightly reduced and the thyroid cartilage was hollow in 100% (nine out of nine) of the mutant.

<sup>†</sup>The arch of the 2nd cervical vertebra was lost in 33% (three in nine), almost lost in 22% (two in nine) and rudimental in 44% (four out of nine).
